# Supplementary material for: Selecting SNPs informative for African, American Indian and European Ancestry: application to the Family Investigation of Nephropathy and Diabetes (FIND)
Source: BMC Genomics. 2016 May 4;17:325. doi: 10.1186/s12864-016-2654-x (PMC4855449; doi:10.1186/s12864-016-2654-x)
Supplement: Additional file 3: — RCWilliamsContrastAI_AF400AIMS. (XLSX 55 kb) [file 12864_2016_2654_MOESM3_ESM.xlsx]

## Sheet: Sheet1
Obs	rs	chromosome	position	allele1	allele2	EU_freq1	AI_freq1	AF_freq1	delta_12	delta_13	delta_23	In_12	In_13	In_23
1	rs10915428	1	4058815	G	T	0.447	0.174	0.735	0.273	0.288	0.561	0.031	0.018	0.093
2	rs2693958	1	7463878	C	T	0.513	0.271	0.798	0.242	0.285	0.527	0.019	0.016	0.068
3	rs4846126	1	12585891	A	G	0.535	0.751	0.241	0.216	0.294	0.51	0.009	0.029	0.069
4	rs7537573	1	19246192	C	T	0.611	0.388	0.902	0.223	0.291	0.514	0.013	0.014	0.053
5	rs3850533	1	19934043	C	T	0.314	0.034	0.604	0.28	0.29	0.57	0.065	0.023	0.154
6	rs11247766	1	28477906	A	G	0.319	0.084	0.603	0.235	0.284	0.519	0.037	0.022	0.111
7	rs878467	1	31019823	A	C	0.465	0.708	0.173	0.243	0.292	0.535	0.013	0.035	0.087
8	rs6664485	1	43998119	C	T	0.296	0.02	0.586	0.276	0.29	0.566	0.072	0.024	0.166
9	rs4926901	1	47798411	A	G	0.389	0.598	0.096	0.209	0.293	0.502	0.011	0.047	0.101
10	rs11589982	1	55516646	C	T	0.597	0.376	0.879	0.221	0.282	0.503	0.013	0.014	0.052
11	rs4912351	1	58835513	G	T	0.704	0.467	0.988	0.237	0.284	0.521	0.012	0.012	0.048
12	rs2243874	1	61529612	A	G	0.217	0.001	0.514	0.216	0.297	0.513	0.072	0.031	0.175
13	rs6588138	1	65610954	A	G	0.451	0.67	0.16	0.219	0.291	0.51	0.011	0.036	0.084
14	rs12036629	1	67961754	A	G	0.531	0.784	0.247	0.253	0.284	0.537	0.012	0.027	0.073
15	rs531773	1	76464645	C	T	0.761	0.997	0.469	0.236	0.292	0.528	0.008	0.017	0.049
16	rs12751064	1	77778712	C	T	0.708	0.454	1	0.254	0.292	0.546	0.014	0.013	0.053
17	rs7521051	1	81629441	C	T	0.522	0.803	0.234	0.281	0.288	0.569	0.015	0.028	0.083
18	rs12134714	1	83134271	C	T	0.341	0.099	0.64	0.242	0.299	0.541	0.035	0.023	0.111
19	rs10874746	1	93096559	C	T	0.664	0.942	0.368	0.278	0.296	0.574	0.012	0.022	0.065
20	rs1507061	1	98342244	A	G	0.296	0.562	0.003	0.266	0.293	0.559	0.021	0.095	0.186
21	rs10785759	1	105926284	C	T	0.597	0.311	0.893	0.286	0.296	0.582	0.023	0.015	0.073
22	rs1264878	1	111748953	C	T	0.531	0.774	0.247	0.243	0.284	0.527	0.011	0.027	0.071
23	rs3006988	1	114328943	C	T	0.5	0.797	0.214	0.297	0.286	0.583	0.017	0.029	0.089
24	rs4659204	1	119911698	A	C	0.358	0.622	0.074	0.264	0.284	0.548	0.018	0.051	0.123
25	rs6681602	1	155647578	A	G	0.554	0.81	0.259	0.256	0.295	0.551	0.012	0.027	0.075
26	rs2213736	1	170731120	C	T	0.518	0.811	0.232	0.293	0.286	0.579	0.016	0.028	0.085
27	rs12140191	1	192054837	C	T	0.305	0.596	0.016	0.291	0.289	0.58	0.024	0.079	0.175
28	rs3767499	1	199287474	C	T	0.451	0.745	0.157	0.294	0.294	0.588	0.018	0.037	0.104
29	rs1538268	1	200467422	A	G	0.42	0.674	0.125	0.254	0.295	0.549	0.015	0.042	0.104
30	rs11240239	1	202879427	A	G	0.412	0.129	0.702	0.283	0.29	0.573	0.039	0.019	0.109
31	rs6667140	1	205636800	A	G	0.708	0.958	0.42	0.25	0.288	0.538	0.009	0.019	0.054
32	rs10863988	1	210961097	A	G	0.237	0.01	0.527	0.227	0.29	0.517	0.065	0.028	0.162
33	rs10127813	1	222644778	A	G	0.25	0.003	0.537	0.247	0.287	0.534	0.079	0.027	0.178
34	rs237789	1	227520494	G	T	0.761	0.997	0.477	0.236	0.284	0.52	0.008	0.016	0.047
35	rs7549105	1	245271679	A	G	0.677	0.97	0.391	0.293	0.286	0.579	0.013	0.019	0.064
36	rs2709441	2	5935069	A	G	0.482	0.259	0.778	0.223	0.296	0.519	0.017	0.018	0.068
37	rs306184	2	6563628	C	T	0.712	0.968	0.423	0.256	0.289	0.545	0.01	0.019	0.055
38	rs309281	2	7113890	A	G	0.332	0.629	0.035	0.297	0.297	0.594	0.023	0.069	0.161
39	rs1686486	2	10887015	A	G	0.381	0.108	0.665	0.273	0.284	0.557	0.041	0.02	0.112
40	rs4832439	2	18564190	C	T	0.656	0.362	0.955	0.294	0.299	0.593	0.022	0.014	0.069
41	rs4953070	2	44250548	A	G	0.403	0.108	0.7	0.295	0.297	0.592	0.046	0.02	0.121
42	rs1346781	2	55890580	C	T	0.363	0.61	0.076	0.247	0.287	0.534	0.016	0.051	0.118
43	rs7557548	2	57519133	A	G	0.77	0.994	0.471	0.224	0.299	0.523	0.007	0.018	0.048
44	rs9309394	2	66862133	C	T	0.527	0.298	0.819	0.229	0.292	0.521	0.016	0.016	0.063
45	rs2002878	2	69591597	C	T	0.642	0.415	0.93	0.227	0.288	0.515	0.012	0.013	0.051
46	rs2694696	2	73993137	A	G	0.712	0.992	0.422	0.28	0.29	0.57	0.012	0.019	0.059
47	rs2860769	2	76525200	C	T	0.646	0.394	0.938	0.252	0.292	0.544	0.015	0.014	0.057
48	rs10175966	2	78222432	C	T	0.728	0.996	0.433	0.268	0.295	0.563	0.01	0.019	0.057
49	rs6723938	2	103250269	A	G	0.712	0.995	0.418	0.283	0.294	0.577	0.012	0.019	0.061
50	rs2004490	2	105934351	C	T	0.655	0.933	0.365	0.278	0.29	0.568	0.012	0.021	0.064
51	rs1990406	2	107276327	C	T	0.721	0.988	0.426	0.267	0.295	0.562	0.01	0.019	0.057
52	rs1435878	2	115189192	C	T	0.628	0.367	0.914	0.261	0.286	0.547	0.017	0.013	0.06
53	rs1017626	2	126045009	C	T	0.54	0.322	0.824	0.218	0.284	0.502	0.014	0.015	0.057
54	rs6712250	2	133063205	A	G	0.345	0.054	0.628	0.291	0.283	0.574	0.059	0.021	0.142
55	rs6432741	2	163541272	A	G	0.549	0.256	0.833	0.293	0.284	0.577	0.027	0.015	0.081
56	rs831037	2	169910089	A	G	0.354	0.14	0.652	0.214	0.298	0.512	0.024	0.022	0.09
57	rs1516448	2	189422392	A	G	0.696	0.933	0.412	0.237	0.284	0.521	0.009	0.018	0.052
58	rs2168058	2	190527123	A	G	0.765	0.996	0.475	0.231	0.29	0.521	0.008	0.017	0.047
59	rs4550664	2	198399650	A	G	0.688	0.393	0.982	0.295	0.294	0.589	0.02	0.013	0.065
60	rs6435050	2	201037369	C	T	0.473	0.717	0.185	0.244	0.288	0.532	0.013	0.033	0.084
61	rs6435069	2	201786739	A	G	0.46	0.185	0.751	0.275	0.291	0.566	0.03	0.018	0.092
62	rs6706279	2	207692460	C	T	0.619	0.856	0.325	0.237	0.294	0.531	0.01	0.023	0.062
63	rs2161969	2	218388815	A	G	0.495	0.725	0.211	0.23	0.284	0.514	0.011	0.029	0.075
64	rs16866695	2	226237268	G	T	0.708	0.965	0.422	0.257	0.286	0.543	0.01	0.018	0.055
65	rs12476880	2	235929039	G	T	0.299	0.507	0	0.208	0.299	0.507	0.014	0.104	0.176
66	rs317529	3	4069375	A	G	0.721	0.999	0.426	0.278	0.295	0.573	0.011	0.019	0.059
67	rs17042007	3	5111564	C	T	0.701	0.488	0.997	0.213	0.296	0.509	0.01	0.013	0.045
68	rs11712268	3	11891653	G	T	0.292	0.063	0.578	0.229	0.286	0.515	0.04	0.024	0.119
69	rs4356808	3	13797768	A	G	0.305	0.518	0.006	0.213	0.299	0.512	0.014	0.093	0.165
70	rs17272355	3	16202432	A	G	0.593	0.873	0.294	0.28	0.299	0.579	0.013	0.026	0.075
71	rs12492090	3	23641186	C	T	0.602	0.382	0.887	0.22	0.285	0.505	0.012	0.014	0.052
72	rs13076635	3	31825509	A	G	0.646	0.425	0.941	0.221	0.295	0.516	0.012	0.014	0.05
73	rs1370717	3	32329391	A	G	0.451	0.682	0.156	0.231	0.295	0.526	0.012	0.037	0.089
74	rs1444878	3	55315858	A	G	0.46	0.188	0.743	0.272	0.283	0.555	0.03	0.017	0.089
75	rs6791931	3	63282103	G	T	0.588	0.363	0.879	0.225	0.291	0.516	0.013	0.015	0.055
76	rs1288701	3	71472188	C	T	0.593	0.844	0.306	0.251	0.287	0.538	0.011	0.023	0.066
77	rs9861834	3	72991962	C	T	0.695	0.973	0.402	0.278	0.293	0.571	0.012	0.02	0.061
78	rs7650723	3	78586047	A	G	0.378	0.108	0.661	0.27	0.283	0.553	0.04	0.02	0.11
79	rs7430666	3	79807776	A	G	0.219	0.003	0.506	0.216	0.287	0.503	0.069	0.029	0.167
80	rs1503845	3	102008560	A	G	0.496	0.755	0.21	0.259	0.286	0.545	0.014	0.03	0.082
81	rs334541	3	121311933	A	G	0.668	0.439	0.965	0.229	0.297	0.526	0.012	0.014	0.05
82	rs9289187	3	123298151	C	T	0.588	0.878	0.294	0.29	0.294	0.584	0.014	0.025	0.076
83	rs868909	3	136342524	C	T	0.765	0.995	0.469	0.23	0.296	0.526	0.008	0.018	0.048
84	rs13083224	3	145284386	A	G	0.27	0.017	0.557	0.253	0.287	0.54	0.067	0.025	0.16
85	rs2687876	3	146973836	C	T	0.407	0.184	0.701	0.223	0.294	0.517	0.022	0.02	0.081
86	rs17283761	3	152070872	A	G	0.531	0.81	0.239	0.279	0.292	0.571	0.015	0.028	0.082
87	rs9290240	3	165780246	C	T	0.773	0.995	0.478	0.222	0.295	0.517	0.007	0.018	0.046
88	rs6791864	3	166523258	G	T	0.296	0.077	0.582	0.219	0.286	0.505	0.034	0.024	0.11
89	rs925363	3	169913477	C	T	0.363	0.585	0.072	0.222	0.291	0.513	0.013	0.053	0.114
90	rs486054	3	177707736	A	G	0.624	0.329	0.909	0.295	0.285	0.58	0.023	0.013	0.071
91	rs1499810	3	178908229	A	G	0.46	0.674	0.173	0.214	0.287	0.501	0.01	0.034	0.079
92	rs12696457	3	179877570	A	G	0.708	0.941	0.412	0.233	0.296	0.529	0.008	0.02	0.053
93	rs9832656	3	192609862	C	T	0.681	0.414	0.968	0.267	0.287	0.554	0.016	0.013	0.057
94	rs12485900	3	194106473	C	T	0.363	0.108	0.647	0.255	0.284	0.539	0.036	0.02	0.107
95	rs6789147	3	195570200	C	T	0.332	0.044	0.617	0.288	0.285	0.573	0.063	0.022	0.149
96	rs2280040	4	4761104	C	T	0.58	0.36	0.872	0.22	0.292	0.512	0.013	0.015	0.055
97	rs6820230	4	9636640	C	T	0.717	0.996	0.432	0.279	0.285	0.564	0.011	0.018	0.057
98	rs12642791	4	12495370	A	G	0.699	0.453	0.986	0.246	0.287	0.533	0.013	0.012	0.05
99	rs3213710	4	15326419	A	G	0.5	0.795	0.21	0.295	0.29	0.585	0.017	0.03	0.091
100	rs2535228	4	17141878	A	G	0.25	0.003	0.533	0.247	0.283	0.53	0.08	0.026	0.177
101	rs964095	4	18144887	A	G	0.606	0.36	0.903	0.246	0.297	0.543	0.016	0.015	0.06
102	rs6837395	4	20741048	C	T	0.509	0.758	0.219	0.249	0.29	0.539	0.012	0.03	0.079
103	rs729317	4	25427772	A	G	0.712	0.493	1	0.219	0.288	0.507	0.01	0.012	0.044
104	rs13135261	4	30383061	A	G	0.726	0.983	0.441	0.257	0.285	0.542	0.01	0.018	0.053
105	rs6835127	4	40899152	C	T	0.465	0.249	0.754	0.216	0.289	0.505	0.017	0.017	0.067
106	rs10000708	4	42170109	G	T	0.638	0.874	0.344	0.236	0.294	0.53	0.009	0.022	0.06
107	rs2353315	4	48157659	A	C	0.554	0.313	0.842	0.241	0.288	0.529	0.017	0.015	0.063
108	rs11734496	4	56807242	A	C	0.531	0.778	0.239	0.247	0.292	0.539	0.012	0.028	0.075
109	rs7698051	4	59961079	A	G	0.358	0.061	0.641	0.297	0.283	0.58	0.058	0.02	0.139
110	rs7694411	4	72225310	C	T	0.23	0.014	0.518	0.216	0.288	0.504	0.057	0.028	0.152
111	rs1496604	4	79628923	C	T	0.774	0.998	0.484	0.224	0.29	0.514	0.007	0.017	0.046
112	rs6846583	4	84902847	C	T	0.23	0.005	0.519	0.225	0.289	0.514	0.069	0.029	0.167
113	rs2728108	4	89180760	A	C	0.46	0.713	0.165	0.253	0.295	0.548	0.014	0.036	0.092
114	rs17259489	4	93926067	C	T	0.398	0.643	0.107	0.245	0.291	0.536	0.015	0.045	0.106
115	rs1435477	4	94762390	A	G	0.527	0.229	0.825	0.298	0.298	0.596	0.03	0.017	0.09
116	rs4699227	4	102682665	C	T	0.615	0.345	0.903	0.27	0.288	0.558	0.019	0.014	0.065
117	rs168989	4	106207364	C	T	0.606	0.902	0.318	0.296	0.288	0.584	0.015	0.023	0.073
118	rs11938968	4	111962201	A	G	0.429	0.727	0.144	0.298	0.285	0.583	0.019	0.037	0.106
119	rs1511140	4	127767871	A	C	0.305	0.085	0.591	0.22	0.286	0.506	0.033	0.023	0.106
120	rs4690728	4	143989409	A	C	0.633	0.927	0.342	0.294	0.291	0.585	0.014	0.022	0.07
121	rs13137669	4	152930393	C	T	0.478	0.247	0.768	0.231	0.29	0.521	0.019	0.017	0.07
122	rs4337691	4	165981378	A	G	0.496	0.759	0.205	0.263	0.291	0.554	0.014	0.031	0.085
123	rs17518913	4	167633125	A	G	0.518	0.283	0.804	0.235	0.286	0.521	0.018	0.016	0.065
124	rs12510928	4	170954378	C	T	0.425	0.137	0.723	0.288	0.298	0.586	0.039	0.02	0.11
125	rs4861864	4	181841004	C	T	0.412	0.173	0.708	0.239	0.296	0.535	0.025	0.02	0.087
126	rs11132640	4	190518762	A	G	0.757	0.979	0.46	0.222	0.297	0.519	0.007	0.018	0.048
127	rs7732493	5	8688917	C	T	0.229	0.002	0.524	0.227	0.295	0.522	0.074	0.03	0.176
128	rs333532	5	24965912	G	T	0.433	0.174	0.729	0.259	0.296	0.555	0.029	0.019	0.092
129	rs6866836	5	27561147	C	T	0.758	0.983	0.474	0.225	0.284	0.509	0.007	0.017	0.045
130	rs2973093	5	37933206	A	G	0.571	0.343	0.854	0.228	0.283	0.511	0.014	0.014	0.056
131	rs35386	5	59838540	C	T	0.589	0.371	0.872	0.218	0.283	0.501	0.012	0.014	0.052
132	rs10068924	5	78102057	C	T	0.42	0.689	0.13	0.269	0.29	0.559	0.016	0.04	0.105
133	rs401912	5	80993595	C	T	0.301	0.587	0.006	0.286	0.295	0.581	0.024	0.092	0.189
134	rs1500148	5	85120692	C	T	0.647	0.419	0.944	0.228	0.297	0.525	0.012	0.014	0.052
135	rs10051486	5	86072786	C	T	0.575	0.826	0.286	0.251	0.289	0.54	0.011	0.025	0.068
136	rs6452795	5	87866790	C	T	0.23	0.006	0.529	0.224	0.299	0.523	0.068	0.03	0.169
137	rs461873	5	95034715	A	G	0.416	0.643	0.131	0.227	0.285	0.512	0.012	0.039	0.092
138	rs1026666	5	99250136	C	T	0.611	0.389	0.893	0.222	0.282	0.504	0.012	0.013	0.051
139	rs2952554	5	103496563	C	T	0.779	0.996	0.482	0.217	0.297	0.514	0.007	0.018	0.046
140	rs250253	5	106880865	C	T	0.668	0.952	0.372	0.284	0.296	0.58	0.013	0.021	0.066
141	rs17134155	5	111509595	C	T	0.745	0.994	0.457	0.249	0.288	0.537	0.009	0.017	0.051
142	rs12719228	5	116628415	A	C	0.712	0.995	0.426	0.283	0.286	0.569	0.012	0.018	0.059
143	rs1966478	5	118655218	C	T	0.712	0.914	0.414	0.202	0.298	0.5	0.006	0.02	0.048
144	rs2604163	5	119842816	A	C	0.765	0.996	0.468	0.231	0.297	0.528	0.008	0.018	0.049
145	rs7712066	5	123745653	A	G	0.664	0.948	0.377	0.284	0.287	0.571	0.013	0.02	0.064
146	rs823761	5	132878340	A	C	0.226	0.003	0.525	0.223	0.299	0.522	0.071	0.031	0.174
147	rs6596299	5	135598466	A	C	0.407	0.641	0.117	0.234	0.29	0.524	0.013	0.042	0.1
148	rs17712730	5	136217669	A	G	0.336	0.586	0.047	0.25	0.289	0.539	0.017	0.061	0.136
149	rs4835671	5	137539700	C	T	0.629	0.385	0.92	0.244	0.291	0.535	0.015	0.014	0.056
150	rs1422788	5	153596838	A	C	0.305	0.008	0.595	0.297	0.29	0.587	0.09	0.024	0.187
151	rs202805	5	157562701	C	T	0.699	0.931	0.409	0.232	0.29	0.522	0.008	0.019	0.052
152	rs6596815	6	135044	A	C	0.726	0.999	0.438	0.273	0.288	0.561	0.011	0.018	0.056
153	rs9379149	6	7947599	C	T	0.319	0.548	0.029	0.229	0.29	0.519	0.015	0.071	0.142
154	rs697749	6	37016360	A	G	0.642	0.403	0.928	0.239	0.286	0.525	0.014	0.013	0.053
155	rs10947723	6	38329996	A	G	0.487	0.227	0.771	0.26	0.284	0.544	0.024	0.016	0.078
156	rs10947909	6	40752247	A	G	0.491	0.28	0.786	0.211	0.295	0.506	0.015	0.017	0.063
157	rs1322653	6	44630376	G	T	0.58	0.821	0.288	0.241	0.292	0.533	0.01	0.025	0.067
158	rs9381876	6	50500644	C	T	0.388	0.65	0.089	0.262	0.299	0.561	0.017	0.051	0.12
159	rs3823064	6	69738338	A	G	0.571	0.783	0.282	0.212	0.289	0.501	0.008	0.025	0.061
160	rs6922656	6	93577997	A	C	0.754	0.989	0.468	0.235	0.286	0.521	0.008	0.017	0.048
161	rs1361288	6	118349686	A	G	0.259	0.004	0.545	0.255	0.286	0.541	0.08	0.026	0.178
162	rs11154433	6	128356297	A	C	0.686	0.415	0.984	0.271	0.298	0.569	0.017	0.013	0.06
163	rs7743660	6	134985153	A	G	0.23	0.01	0.521	0.22	0.291	0.511	0.062	0.029	0.159
164	rs597144	6	149667305	C	T	0.279	0.04	0.566	0.239	0.287	0.526	0.05	0.025	0.136
165	rs4708941	6	158119224	A	G	0.301	0.546	0.01	0.245	0.291	0.536	0.018	0.086	0.168
166	rs316007	6	160596398	C	T	0.23	0.006	0.516	0.224	0.286	0.51	0.068	0.028	0.165
167	rs6905881	6	166157406	C	T	0.584	0.856	0.288	0.272	0.296	0.568	0.013	0.026	0.074
168	rs1990346	7	12868363	A	G	0.429	0.135	0.727	0.294	0.298	0.592	0.04	0.019	0.112
169	rs1072965	7	15931279	C	T	0.732	0.958	0.441	0.226	0.291	0.517	0.008	0.018	0.049
170	rs3807496	7	16787880	A	G	0.628	0.412	0.92	0.216	0.292	0.508	0.011	0.014	0.05
171	rs11982629	7	19333033	C	T	0.42	0.148	0.716	0.272	0.296	0.568	0.034	0.02	0.102
172	rs13238408	7	31832220	A	G	0.228	0.005	0.527	0.223	0.299	0.522	0.069	0.03	0.171
173	rs1993050	7	32579545	A	G	0.336	0.059	0.63	0.277	0.294	0.571	0.054	0.023	0.138
174	rs10951406	7	34140377	A	G	0.763	0.993	0.477	0.23	0.286	0.516	0.008	0.017	0.046
175	rs2717931	7	37729658	C	T	0.27	0.042	0.563	0.228	0.293	0.521	0.046	0.026	0.133
176	rs29887	7	40928791	A	G	0.527	0.736	0.23	0.209	0.297	0.506	0.009	0.03	0.07
177	rs2159199	7	43140884	C	T	0.487	0.726	0.191	0.239	0.296	0.535	0.012	0.033	0.083
178	rs4285433	7	49084731	C	T	0.54	0.337	0.84	0.203	0.3	0.503	0.012	0.016	0.055
179	rs2461628	7	54531958	C	T	0.714	0.481	0.997	0.233	0.283	0.516	0.011	0.012	0.046
180	rs6965753	7	64144339	G	T	0.531	0.736	0.233	0.205	0.298	0.503	0.008	0.03	0.069
181	rs10447824	7	77996776	C	T	0.665	0.415	0.961	0.25	0.296	0.546	0.015	0.014	0.056
182	rs4728044	7	79741806	A	G	0.628	0.879	0.33	0.251	0.298	0.549	0.01	0.024	0.065
183	rs12704484	7	89248034	A	G	0.341	0.128	0.628	0.213	0.287	0.5	0.025	0.022	0.09
184	rs4727959	7	122460351	C	T	0.274	0.058	0.562	0.216	0.288	0.504	0.038	0.025	0.118
185	rs10954172	7	127651241	A	G	0.344	0.638	0.051	0.294	0.293	0.587	0.022	0.061	0.148
186	rs339054	7	128169747	G	T	0.46	0.185	0.747	0.275	0.287	0.562	0.03	0.017	0.091
187	rs292616	7	134554932	C	T	0.257	0.029	0.551	0.228	0.294	0.522	0.053	0.027	0.144
188	rs2701016	7	135622254	A	C	0.305	0.587	0.018	0.282	0.287	0.569	0.023	0.077	0.169
189	rs322240	7	136607530	A	C	0.686	0.914	0.394	0.228	0.292	0.52	0.008	0.02	0.053
190	rs228584	7	144054292	C	T	0.553	0.286	0.846	0.267	0.293	0.56	0.022	0.015	0.072
191	rs7797553	7	145456149	A	G	0.743	0.997	0.453	0.254	0.29	0.544	0.009	0.018	0.052
192	rs12531498	7	153707191	A	G	0.664	0.886	0.381	0.222	0.283	0.505	0.008	0.019	0.052
193	rs3752670	8	211922	C	T	0.549	0.313	0.845	0.236	0.296	0.532	0.016	0.016	0.063
194	rs2515432	8	6362181	C	T	0.478	0.189	0.763	0.289	0.285	0.574	0.032	0.017	0.093
195	rs13282410	8	12745511	C	T	0.235	0.002	0.527	0.233	0.292	0.525	0.077	0.029	0.178
196	rs985314	8	14953384	A	G	0.603	0.873	0.319	0.27	0.284	0.554	0.012	0.022	0.067
197	rs2197089	8	19870653	A	G	0.558	0.311	0.842	0.247	0.284	0.531	0.018	0.015	0.063
198	rs448872	8	26497901	A	G	0.541	0.761	0.256	0.22	0.285	0.505	0.009	0.026	0.066
199	rs17282442	8	34113374	A	G	0.345	0.582	0.06	0.237	0.285	0.522	0.015	0.055	0.123
200	rs3015778	8	36967714	C	T	0.625	0.373	0.909	0.252	0.284	0.536	0.016	0.013	0.058
201	rs12547436	8	40866824	C	T	0.327	0.59	0.029	0.263	0.298	0.561	0.019	0.073	0.156
202	rs7836244	8	41866919	G	T	0.27	0.003	0.557	0.267	0.287	0.554	0.086	0.025	0.185
203	rs2062457	8	48027734	G	T	0.708	0.995	0.415	0.287	0.293	0.58	0.012	0.019	0.061
204	rs7463424	8	53852662	C	T	0.392	0.101	0.692	0.291	0.3	0.591	0.046	0.021	0.124
205	rs4738606	8	58677487	A	G	0.345	0.592	0.053	0.247	0.292	0.539	0.016	0.06	0.132
206	rs4737870	8	69046008	A	G	0.292	0.508	0	0.216	0.292	0.508	0.015	0.101	0.176
207	rs7826437	8	72619125	C	T	0.465	0.763	0.181	0.298	0.284	0.582	0.018	0.032	0.097
208	rs297571	8	96252193	A	G	0.699	0.977	0.414	0.278	0.285	0.563	0.012	0.018	0.059
209	rs1484626	8	97077925	C	T	0.425	0.175	0.714	0.25	0.289	0.539	0.027	0.019	0.088
210	rs2679749	8	103927664	C	T	0.549	0.267	0.848	0.282	0.299	0.581	0.025	0.016	0.08
211	rs2177112	8	114288167	A	G	0.71	0.996	0.425	0.286	0.285	0.571	0.012	0.018	0.059
212	rs1372992	8	129666841	C	T	0.23	0.004	0.527	0.226	0.297	0.523	0.072	0.03	0.173
213	rs9297810	8	131582084	C	T	0.58	0.352	0.869	0.228	0.289	0.517	0.014	0.015	0.057
214	rs726576	8	133349055	C	T	0.407	0.192	0.702	0.215	0.295	0.51	0.02	0.02	0.077
215	rs1474539	8	134015271	C	T	0.54	0.785	0.255	0.245	0.285	0.53	0.011	0.026	0.071
216	rs10105839	8	136816163	G	T	0.35	0.612	0.051	0.262	0.299	0.561	0.018	0.063	0.14
217	rs7006032	8	140328379	C	T	0.558	0.277	0.852	0.281	0.294	0.575	0.024	0.015	0.077
218	rs2246690	9	7446194	A	G	0.341	0.134	0.636	0.207	0.295	0.502	0.023	0.023	0.089
219	rs10756202	9	11184921	A	G	0.275	0.05	0.574	0.225	0.299	0.524	0.043	0.027	0.129
220	rs4741366	9	14366038	C	T	0.323	0.612	0.027	0.289	0.296	0.585	0.023	0.074	0.165
221	rs1463030	9	22901864	C	T	0.597	0.353	0.895	0.244	0.298	0.542	0.016	0.015	0.061
222	rs1981009	9	32920630	G	T	0.456	0.755	0.171	0.299	0.285	0.584	0.019	0.034	0.099
223	rs7018692	9	70711601	C	T	0.761	0.989	0.465	0.228	0.296	0.524	0.007	0.018	0.048
224	rs1891301	9	73208316	C	T	0.513	0.297	0.811	0.216	0.298	0.514	0.015	0.017	0.062
225	rs10780315	9	81358422	C	T	0.277	0.017	0.575	0.26	0.298	0.558	0.069	0.027	0.166
226	rs1212171	9	86472347	C	T	0.429	0.213	0.726	0.216	0.297	0.513	0.019	0.019	0.074
227	rs6479401	9	91931459	C	T	0.73	0.999	0.438	0.269	0.292	0.561	0.011	0.018	0.056
228	rs12338409	9	96730910	C	T	0.504	0.802	0.22	0.298	0.284	0.582	0.017	0.029	0.088
229	rs2479827	9	98028250	A	G	0.704	0.992	0.412	0.288	0.292	0.58	0.012	0.019	0.062
230	rs10816576	9	109593488	A	G	0.403	0.117	0.702	0.286	0.299	0.585	0.042	0.02	0.116
231	rs7037742	9	113676191	C	T	0.221	0.004	0.518	0.217	0.297	0.514	0.069	0.031	0.17
232	rs1038776	9	116141066	A	G	0.42	0.69	0.121	0.27	0.299	0.569	0.017	0.044	0.11
233	rs10983960	9	120111184	C	T	0.31	0.54	0.027	0.23	0.283	0.513	0.016	0.07	0.142
234	rs913232	9	126602794	A	G	0.717	0.972	0.43	0.255	0.287	0.542	0.01	0.018	0.054
235	rs915401	9	132878592	A	G	0.606	0.841	0.313	0.235	0.293	0.528	0.01	0.024	0.063
236	rs33978946	10	43229189	C	T	0.681	0.401	0.977	0.28	0.296	0.576	0.018	0.013	0.062
237	rs10857549	10	49091179	C	T	0.757	0.967	0.467	0.21	0.29	0.5	0.006	0.017	0.045
238	rs11101001	10	50038345	A	C	0.36	0.088	0.652	0.272	0.292	0.564	0.044	0.021	0.122
239	rs1925297	10	58311626	C	T	0.752	0.993	0.455	0.241	0.297	0.538	0.008	0.018	0.051
240	rs11006122	10	59795883	C	T	0.652	0.874	0.365	0.222	0.287	0.509	0.008	0.021	0.054
241	rs3125734	10	63628118	C	T	0.65	0.938	0.352	0.288	0.298	0.586	0.013	0.022	0.069
242	rs10997484	10	68456470	A	G	0.381	0.654	0.092	0.273	0.289	0.562	0.018	0.047	0.119
243	rs2637253	10	77981293	G	T	0.509	0.264	0.807	0.245	0.298	0.543	0.02	0.017	0.072
244	rs2345209	10	82686693	C	T	0.367	0.105	0.661	0.262	0.294	0.556	0.039	0.021	0.113
245	rs12262773	10	83423430	G	T	0.73	0.992	0.438	0.262	0.292	0.554	0.01	0.018	0.055
246	rs4315004	10	85929531	G	T	0.389	0.617	0.105	0.228	0.284	0.512	0.013	0.043	0.1
247	rs1892532	10	92323428	G	T	0.323	0.538	0.033	0.215	0.29	0.505	0.014	0.068	0.135
248	rs10884639	10	110124964	C	T	0.658	0.925	0.36	0.267	0.298	0.565	0.011	0.022	0.064
249	rs979416	10	117582721	C	T	0.473	0.255	0.77	0.218	0.297	0.515	0.017	0.018	0.068
250	rs242969	10	119220534	A	G	0.69	0.446	0.982	0.244	0.292	0.536	0.013	0.013	0.052
251	rs10787876	10	120646194	C	T	0.522	0.238	0.805	0.284	0.283	0.567	0.027	0.015	0.081
252	rs11199503	10	122453172	A	C	0.639	0.388	0.922	0.251	0.283	0.534	0.016	0.013	0.056
253	rs10829661	10	131616730	C	T	0.646	0.882	0.352	0.236	0.294	0.53	0.009	0.022	0.059
254	rs11021732	11	2197848	C	T	0.35	0.08	0.648	0.27	0.298	0.568	0.046	0.023	0.126
255	rs871939	11	12496335	C	T	0.699	0.998	0.408	0.299	0.291	0.59	0.013	0.019	0.064
256	rs2114117	11	19197896	A	G	0.261	0.005	0.547	0.256	0.286	0.542	0.08	0.026	0.178
257	rs1945430	11	21309165	A	G	0.735	0.977	0.451	0.242	0.284	0.526	0.009	0.017	0.05
258	rs7396827	11	28534443	C	T	0.558	0.286	0.854	0.272	0.296	0.568	0.022	0.016	0.074
259	rs4756002	11	33754267	A	G	0.323	0.549	0.033	0.226	0.29	0.516	0.015	0.068	0.138
260	rs1371678	11	40372911	G	T	0.323	0.581	0.029	0.258	0.294	0.552	0.019	0.072	0.153
261	rs7108238	11	41855753	C	T	0.319	0.061	0.609	0.258	0.29	0.548	0.048	0.023	0.13
262	rs10734520	11	43891293	A	G	0.35	0.053	0.646	0.297	0.296	0.593	0.061	0.022	0.148
263	rs530312	11	51249292	A	G	0.509	0.282	0.803	0.227	0.294	0.521	0.017	0.017	0.065
264	rs905770	11	65913341	C	T	0.704	0.965	0.418	0.261	0.286	0.547	0.01	0.018	0.056
265	rs7117374	11	70965820	G	T	0.545	0.328	0.844	0.217	0.299	0.516	0.014	0.016	0.059
266	rs7937238	11	77409064	C	T	0.456	0.208	0.739	0.248	0.283	0.531	0.024	0.017	0.079
267	rs10734135	11	90112623	A	C	0.455	0.68	0.173	0.225	0.282	0.507	0.011	0.033	0.081
268	rs10831016	11	92645586	C	T	0.531	0.321	0.822	0.21	0.291	0.501	0.013	0.016	0.057
269	rs673092	11	106700216	A	C	0.469	0.208	0.763	0.261	0.294	0.555	0.026	0.018	0.084
270	rs7127212	11	118458412	C	T	0.621	0.85	0.337	0.229	0.284	0.513	0.009	0.021	0.057
271	rs6590326	11	127746550	C	T	0.685	0.457	0.978	0.228	0.293	0.521	0.011	0.013	0.048
272	rs10894126	11	129118377	C	T	0.686	0.413	0.98	0.273	0.294	0.567	0.017	0.013	0.059
273	rs7105814	11	132764955	A	G	0.704	0.964	0.412	0.26	0.292	0.552	0.01	0.019	0.057
274	rs10161032	12	2024364	C	T	0.279	0.007	0.569	0.272	0.29	0.562	0.082	0.025	0.18
275	rs1163900	12	17503884	A	G	0.265	0.041	0.547	0.224	0.282	0.506	0.046	0.025	0.13
276	rs12823467	12	20834843	C	T	0.69	0.899	0.398	0.209	0.292	0.501	0.007	0.02	0.05
277	rs853235	12	49662236	C	T	0.261	0.033	0.551	0.228	0.29	0.518	0.05	0.026	0.139
278	rs2069502	12	56430932	C	T	0.67	0.447	0.969	0.223	0.299	0.522	0.011	0.014	0.049
279	rs11177435	12	67669528	G	T	0.327	0.105	0.613	0.222	0.286	0.508	0.03	0.022	0.1
280	rs2278345	12	69221228	C	T	0.265	0.026	0.549	0.239	0.284	0.523	0.057	0.025	0.147
281	rs11115250	12	75660978	A	G	0.279	0.035	0.578	0.244	0.299	0.543	0.054	0.027	0.145
282	rs6539644	12	81167003	C	T	0.566	0.335	0.854	0.231	0.288	0.519	0.015	0.015	0.058
283	rs7302561	12	84622371	A	G	0.513	0.287	0.805	0.226	0.292	0.518	0.016	0.016	0.064
284	rs1558729	12	96242149	A	C	0.235	0.004	0.519	0.231	0.284	0.515	0.072	0.027	0.169
285	rs12307325	12	98200761	G	T	0.721	0.994	0.424	0.273	0.297	0.57	0.011	0.019	0.059
286	rs838909	12	123853601	A	G	0.571	0.817	0.276	0.246	0.295	0.541	0.011	0.026	0.07
287	rs2172327	12	128672611	A	G	0.549	0.336	0.844	0.213	0.295	0.508	0.013	0.016	0.056
288	rs932880	13	23086039	C	T	0.664	0.89	0.366	0.226	0.298	0.524	0.008	0.022	0.056
289	rs7325920	13	23609395	C	T	0.496	0.758	0.206	0.262	0.29	0.552	0.014	0.031	0.084
290	rs9551705	13	29070495	A	G	0.712	0.422	1	0.29	0.288	0.578	0.019	0.012	0.06
291	rs9603175	13	36858839	C	T	0.518	0.296	0.805	0.222	0.287	0.509	0.015	0.016	0.061
292	rs1886214	13	41846531	C	T	0.243	0.025	0.537	0.218	0.294	0.512	0.051	0.028	0.144
293	rs3014966	13	44996995	C	T	0.726	0.995	0.43	0.269	0.296	0.565	0.011	0.019	0.058
294	rs1923888	13	46322386	A	G	0.31	0.578	0.016	0.268	0.294	0.562	0.021	0.081	0.169
295	rs11148083	13	47220140	A	G	0.535	0.251	0.825	0.284	0.29	0.574	0.026	0.016	0.081
296	rs9535772	13	51319677	C	T	0.487	0.775	0.204	0.288	0.283	0.571	0.017	0.03	0.089
297	rs302885	13	60456443	G	T	0.335	0.056	0.623	0.279	0.288	0.567	0.055	0.022	0.138
298	rs1333019	13	65083782	G	T	0.257	0.005	0.549	0.252	0.292	0.544	0.078	0.027	0.177
299	rs4885023	13	72141987	C	T	0.723	0.994	0.432	0.271	0.291	0.562	0.011	0.019	0.057
300	rs959898	13	92534850	C	T	0.446	0.166	0.741	0.28	0.295	0.575	0.033	0.019	0.098
301	rs9525014	13	94989601	G	T	0.549	0.279	0.84	0.27	0.291	0.561	0.022	0.015	0.074
302	rs1360437	13	96332205	C	T	0.442	0.678	0.146	0.236	0.296	0.532	0.013	0.039	0.093
303	rs994513	13	102990414	A	G	0.208	0.004	0.506	0.204	0.298	0.502	0.064	0.032	0.166
304	rs7322737	13	104062800	A	G	0.496	0.258	0.787	0.238	0.291	0.529	0.019	0.017	0.07
305	rs4772691	13	104981308	A	G	0.647	0.36	0.947	0.287	0.3	0.587	0.021	0.014	0.068
306	rs1935132	13	107125954	C	T	0.491	0.199	0.78	0.292	0.289	0.581	0.032	0.017	0.092
307	rs2391785	13	109165751	A	G	0.252	0.004	0.545	0.248	0.293	0.541	0.079	0.028	0.179
308	rs712342	14	36352544	A	G	0.741	0.994	0.45	0.253	0.291	0.544	0.009	0.018	0.052
309	rs17741591	14	46885869	A	G	0.451	0.687	0.154	0.236	0.297	0.533	0.012	0.038	0.091
310	rs1959824	14	53014679	A	G	0.527	0.755	0.243	0.228	0.284	0.512	0.01	0.027	0.069
311	rs1953539	14	61571932	A	G	0.752	0.986	0.465	0.234	0.287	0.521	0.008	0.017	0.048
312	rs8011563	14	67010836	A	C	0.42	0.71	0.136	0.29	0.284	0.574	0.019	0.038	0.107
313	rs11850191	14	67521811	A	G	0.774	0.998	0.482	0.224	0.292	0.516	0.007	0.017	0.046
314	rs8019383	14	68347094	A	G	0.735	0.999	0.449	0.264	0.286	0.55	0.01	0.017	0.054
315	rs4087433	14	77627320	A	G	0.509	0.235	0.805	0.274	0.296	0.57	0.026	0.017	0.083
316	rs4899737	14	78779263	G	T	0.69	0.408	0.973	0.282	0.283	0.565	0.018	0.012	0.06
317	rs1290521	14	85263346	A	G	0.527	0.275	0.823	0.252	0.296	0.548	0.02	0.016	0.072
318	rs8006194	14	88980606	A	C	0.572	0.828	0.272	0.256	0.3	0.556	0.012	0.027	0.074
319	rs4904886	14	91914123	A	G	0.356	0.584	0.064	0.228	0.292	0.52	0.014	0.056	0.12
320	rs1243167	14	93911394	A	G	0.241	0.001	0.537	0.24	0.296	0.536	0.081	0.029	0.183
321	rs3098543	15	25492753	A	G	0.712	0.978	0.418	0.266	0.294	0.56	0.011	0.019	0.058
322	rs8027951	15	28717792	G	T	0.551	0.816	0.254	0.265	0.297	0.562	0.013	0.028	0.078
323	rs12911648	15	30983562	G	T	0.658	0.892	0.37	0.234	0.288	0.522	0.009	0.02	0.056
324	rs542036	15	41328431	C	T	0.288	0.045	0.572	0.243	0.284	0.527	0.049	0.024	0.133
325	rs933856	15	48271028	C	T	0.688	0.927	0.395	0.239	0.293	0.532	0.009	0.02	0.055
326	rs4776220	15	52357520	G	T	0.625	0.851	0.337	0.226	0.288	0.514	0.009	0.022	0.057
327	rs2279605	15	55611622	A	G	0.544	0.311	0.833	0.233	0.289	0.522	0.016	0.015	0.062
328	rs8041905	15	59823892	C	T	0.402	0.177	0.702	0.225	0.3	0.525	0.022	0.021	0.084
329	rs2414865	15	63023928	C	T	0.469	0.223	0.766	0.246	0.297	0.543	0.022	0.018	0.079
330	rs4777590	15	71194141	A	G	0.621	0.327	0.92	0.294	0.299	0.593	0.023	0.015	0.073
331	rs7182283	15	73430812	G	T	0.465	0.2	0.754	0.265	0.289	0.554	0.027	0.017	0.086
332	rs4886798	15	74460281	C	T	0.642	0.419	0.934	0.223	0.292	0.515	0.012	0.014	0.05
333	rs8032724	15	77096133	C	T	0.441	0.16	0.724	0.281	0.283	0.564	0.034	0.017	0.097
334	rs2348145	15	85679607	C	T	0.312	0.56	0.025	0.248	0.287	0.535	0.018	0.072	0.151
335	rs8027498	15	89595638	A	G	0.248	0.009	0.541	0.239	0.293	0.532	0.069	0.028	0.167
336	rs11634566	15	91331419	A	G	0.487	0.773	0.196	0.286	0.291	0.577	0.016	0.032	0.092
337	rs1863094	15	92916997	A	G	0.252	0.002	0.541	0.25	0.289	0.539	0.083	0.027	0.183
338	rs8064205	16	309414	A	G	0.434	0.184	0.733	0.25	0.299	0.549	0.026	0.019	0.088
339	rs7195006	16	6939204	A	C	0.695	0.431	0.992	0.264	0.297	0.561	0.016	0.013	0.057
340	rs27908	16	11164602	A	G	0.394	0.615	0.111	0.221	0.283	0.504	0.012	0.042	0.096
341	rs2432630	16	12379166	C	T	0.314	0.536	0.031	0.222	0.283	0.505	0.015	0.067	0.136
342	rs6498482	16	13895220	C	T	0.358	0.069	0.648	0.289	0.29	0.579	0.054	0.021	0.135
343	rs4782010	16	17316373	C	T	0.558	0.261	0.847	0.297	0.289	0.586	0.028	0.015	0.082
344	rs8060055	16	19089365	C	T	0.464	0.192	0.755	0.272	0.291	0.563	0.029	0.018	0.09
345	rs4787779	16	25809475	A	C	0.595	0.87	0.309	0.275	0.286	0.561	0.013	0.023	0.07
346	rs8049108	16	30283987	C	T	0.345	0.051	0.629	0.294	0.284	0.578	0.062	0.021	0.146
347	rs6500231	16	48131349	A	G	0.296	0.006	0.584	0.29	0.288	0.578	0.09	0.024	0.187
348	rs1477196	16	52365759	A	G	0.341	0.639	0.049	0.298	0.292	0.59	0.023	0.061	0.15
349	rs2088741	16	58243610	A	G	0.619	0.361	0.916	0.258	0.297	0.555	0.017	0.014	0.062
350	rs11641766	16	60618471	A	G	0.527	0.763	0.244	0.236	0.283	0.519	0.011	0.027	0.07
351	rs9936642	16	70767020	C	T	0.588	0.813	0.298	0.225	0.29	0.515	0.009	0.024	0.062
352	rs10863202	16	84545499	A	G	0.341	0.05	0.635	0.291	0.294	0.585	0.06	0.022	0.147
353	rs12600950	17	8173810	G	T	0.335	0.573	0.043	0.238	0.292	0.53	0.016	0.064	0.136
354	rs7218628	17	12310064	A	G	0.659	0.43	0.953	0.229	0.294	0.523	0.012	0.013	0.051
355	rs2218348	17	13593943	C	T	0.695	0.445	0.981	0.25	0.286	0.536	0.014	0.012	0.052
356	rs2701461	17	29219280	C	T	0.229	0.004	0.514	0.225	0.285	0.51	0.07	0.028	0.167
357	rs11652633	17	46406278	C	T	0.305	0.54	0.02	0.235	0.285	0.52	0.017	0.075	0.151
358	rs1263973	17	47140862	A	C	0.403	0.645	0.117	0.242	0.286	0.528	0.014	0.042	0.101
359	rs1896877	17	50033747	A	G	0.681	0.942	0.385	0.261	0.296	0.557	0.011	0.021	0.06
360	rs10432042	17	62739160	C	T	0.342	0.617	0.053	0.275	0.289	0.564	0.02	0.059	0.14
361	rs4789251	17	71710413	C	T	0.584	0.346	0.879	0.238	0.295	0.533	0.015	0.015	0.06
362	rs2703519	17	74698640	C	T	0.527	0.279	0.821	0.248	0.294	0.542	0.019	0.016	0.07
363	rs6506395	18	6464590	A	G	0.739	0.997	0.455	0.258	0.284	0.542	0.01	0.017	0.052
364	rs931359	18	20145749	A	G	0.779	0.996	0.492	0.217	0.287	0.504	0.007	0.016	0.044
365	rs11659824	18	34983426	C	T	0.544	0.323	0.84	0.221	0.296	0.517	0.014	0.016	0.059
366	rs2175565	18	44333850	A	G	0.73	0.939	0.436	0.209	0.294	0.503	0.007	0.019	0.047
367	rs645858	18	50047088	A	G	0.296	0.528	0.009	0.232	0.287	0.519	0.017	0.085	0.163
368	rs1657424	18	52813885	C	T	0.71	0.946	0.412	0.236	0.298	0.534	0.008	0.02	0.054
369	rs895007	18	55279315	A	C	0.314	0.538	0.025	0.224	0.289	0.513	0.015	0.073	0.144
370	rs2850717	18	59912520	A	G	0.708	0.965	0.42	0.257	0.288	0.545	0.01	0.019	0.055
371	rs7227331	18	67249515	A	G	0.304	0.538	0.02	0.234	0.284	0.518	0.017	0.075	0.15
372	rs9959822	18	72927263	A	G	0.447	0.213	0.746	0.234	0.299	0.533	0.021	0.019	0.078
373	rs10415281	19	9460034	C	T	0.597	0.327	0.893	0.27	0.296	0.566	0.02	0.015	0.068
374	rs5925	19	11091881	C	T	0.434	0.671	0.144	0.237	0.29	0.527	0.013	0.038	0.092
375	rs17654580	19	17989388	C	T	0.487	0.236	0.776	0.251	0.289	0.54	0.022	0.017	0.076
376	rs771359	19	23053065	C	T	0.73	0.995	0.432	0.265	0.298	0.563	0.01	0.019	0.057
377	rs257668	19	63160824	C	T	0.42	0.691	0.129	0.271	0.291	0.562	0.017	0.041	0.106
378	rs1106699	20	776791	C	T	0.465	0.196	0.758	0.269	0.293	0.562	0.028	0.018	0.089
379	rs241612	20	3865397	A	G	0.27	0.004	0.555	0.266	0.285	0.551	0.085	0.025	0.183
380	rs6107647	20	5465445	A	G	0.319	0.064	0.608	0.255	0.289	0.544	0.046	0.023	0.127
381	rs6033214	20	11672001	G	T	0.566	0.85	0.277	0.284	0.289	0.573	0.014	0.025	0.076
382	rs6043684	20	15971836	A	C	0.496	0.211	0.793	0.285	0.297	0.582	0.029	0.017	0.09
383	rs6075709	20	20709606	A	G	0.385	0.621	0.086	0.236	0.299	0.535	0.014	0.051	0.114
384	rs6036504	20	23668422	C	T	0.686	0.437	0.973	0.249	0.287	0.536	0.014	0.012	0.052
385	rs6107027	20	25236632	A	G	0.527	0.754	0.243	0.227	0.284	0.511	0.01	0.027	0.069
386	rs6060960	20	29858178	A	C	0.788	0.997	0.496	0.209	0.292	0.501	0.006	0.017	0.043
387	rs1022818	20	40799114	A	G	0.677	0.897	0.379	0.22	0.298	0.518	0.008	0.021	0.054
388	rs2073172	20	45242583	A	G	0.54	0.819	0.243	0.279	0.297	0.576	0.014	0.029	0.083
389	rs6024725	20	54246940	C	T	0.296	0.007	0.588	0.289	0.292	0.581	0.088	0.025	0.187
390	rs6027343	20	58151063	C	T	0.531	0.258	0.827	0.273	0.296	0.569	0.024	0.016	0.078
391	rs2747351	21	13702207	A	G	0.364	0.601	0.08	0.237	0.284	0.521	0.015	0.049	0.113
392	rs441431	21	28519884	A	G	0.336	0.06	0.625	0.276	0.289	0.565	0.053	0.022	0.136
393	rs3787720	21	34825923	A	G	0.341	0.05	0.63	0.291	0.289	0.58	0.061	0.022	0.146
394	rs9975884	21	39965060	G	T	0.562	0.338	0.856	0.224	0.294	0.518	0.014	0.015	0.058
395	rs4822416	22	22146428	A	G	0.584	0.844	0.298	0.26	0.286	0.546	0.012	0.024	0.068
396	rs8142661	22	24509312	C	T	0.35	0.064	0.642	0.286	0.292	0.578	0.055	0.022	0.138
397	rs2072051	22	28085888	C	T	0.606	0.391	0.901	0.215	0.295	0.51	0.012	0.015	0.052
398	rs1034589	22	29909233	C	T	0.301	0.594	0.003	0.293	0.298	0.591	0.024	0.097	0.197
399	rs9622423	22	35311202	C	T	0.31	0.564	0.027	0.254	0.283	0.537	0.019	0.07	0.15
400	rs11090762	22	46133989	G	T	0.509	0.221	0.798	0.288	0.289	0.577	0.029	0.016	0.087
